# Supplementary material for: Directly suspended-solidified floating organic droplets for the determination of fungicides in water and honey samples
Source: Royal Society of Chemistry journal article supplement (doi:10.1039/c4ay00806e), 2014-01-01
Supplement: c4ay00806e1.pdf [file c4ay00806e1.pdf]

Directly suspended–solidified floating organic droplets for the determination of fungicides in  
water and honey samples

*Songqing Li, Xiaoling Yang, Lu Hu, Xiangqian Cui, Sanbing Zhang, Runhua Lu, Wenfeng Zhou,  
Haixiang Gao\**

Department of Applied Chemistry, China Agricultural University, Yuanmingyuan West Road 2#,  
Haidian District, Beijing 100193, China

\*Corresponding author: Tel.: +86 10 62731991

*E-mail address:* hxgao@cau.edu.cn

### Supplementary Information

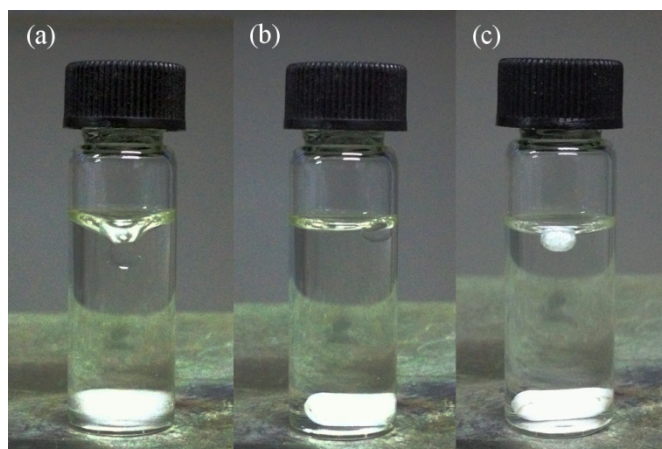

Fig. S1. Photographs of each step in the DS-SFO process: (a) during extraction, the extractant microdroplet is suspended at the bottom of the vortex; (b) after extraction, the extractant microdroplets floated on the matrix; and (c) after lowering the temperature, the solidified extractant microdroplet floated on the matrix.

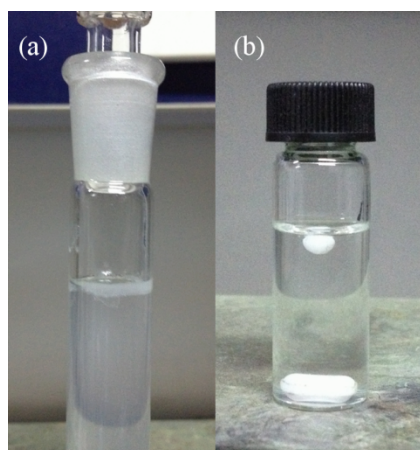

Fig. S2. States of the extraction phase after solidification using different types of LPME: (a) DLLME-SFO and (b) DS-SFO.
